# Supplementary material for: Identification of Potential Phytochemical/Antimicrobial Agents against Pseudoperonospora cubensis Causing Downy Mildew in Cucumber through In-Silico Docking
Source: MDPI journal article supplement (doi:10.3390/plants12112202), 2023-06-02
Supplement: s1 [file s1]

**Supplementary Figure S2.** 3D visualization of the interaction between cytochrome oxidase subunit 1 protein with top nine phytochemicals A) Cucurbitacin-I B) Saponarin C) Cucurbitacin-D D) Cucurbitacin-E E) Swertianolin F) Cucurbitacin-A G) Cucurbitacin-B H) Cucumerin-A I) Luotonin A.

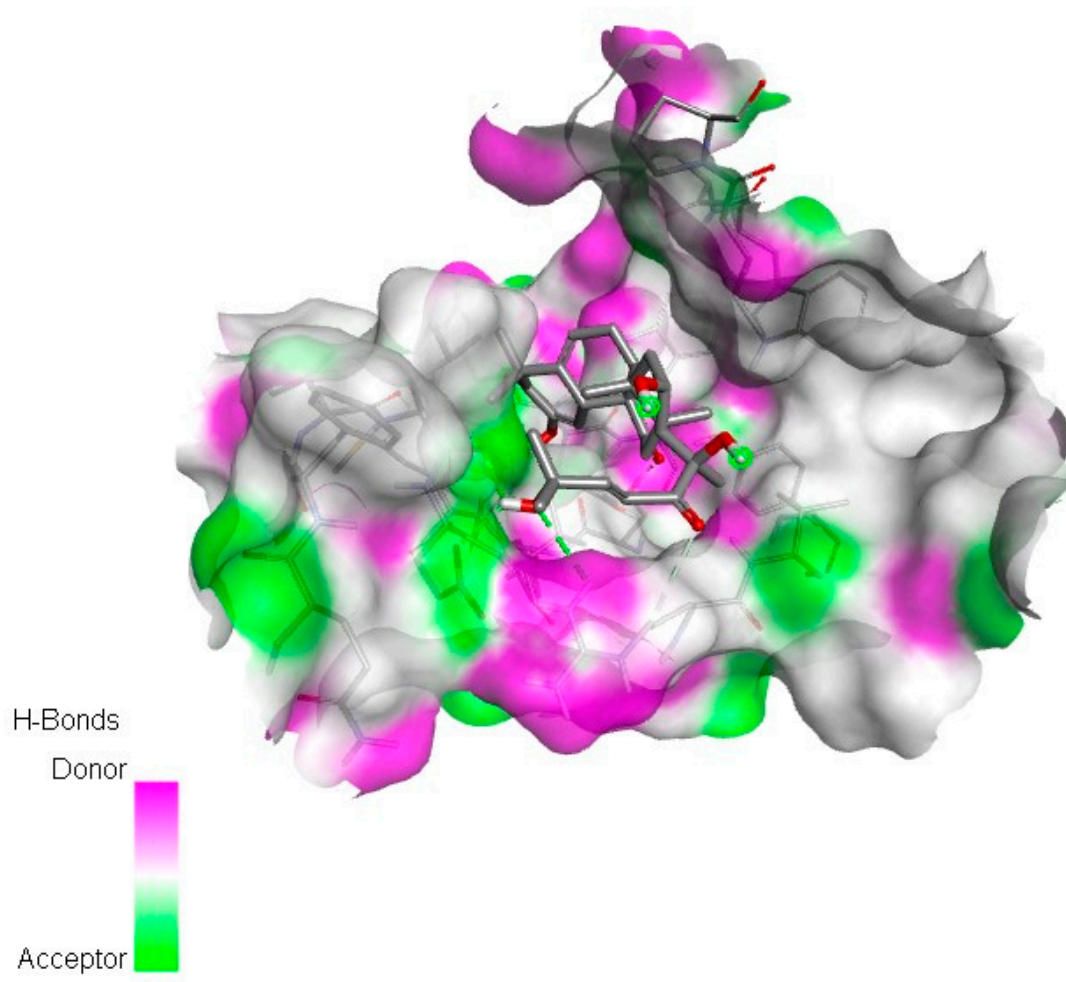

**A) Cucurbitacin-I**

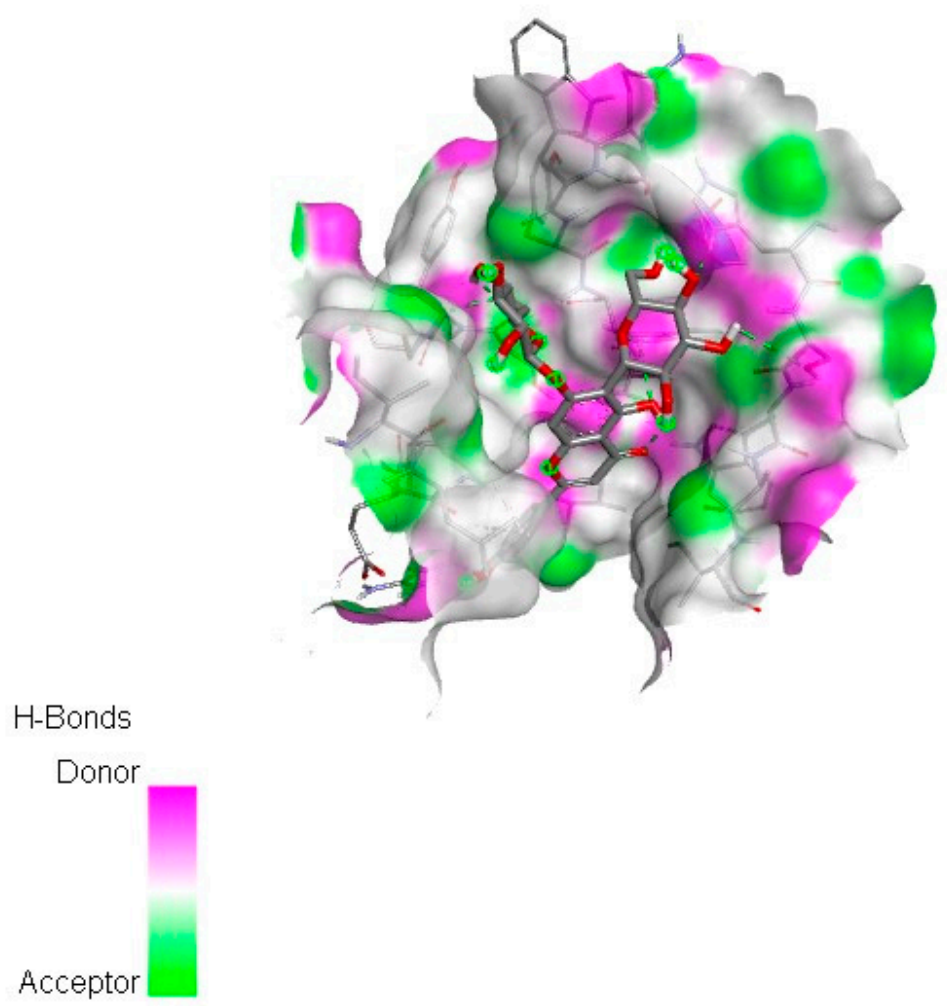

**B) Saponarin**

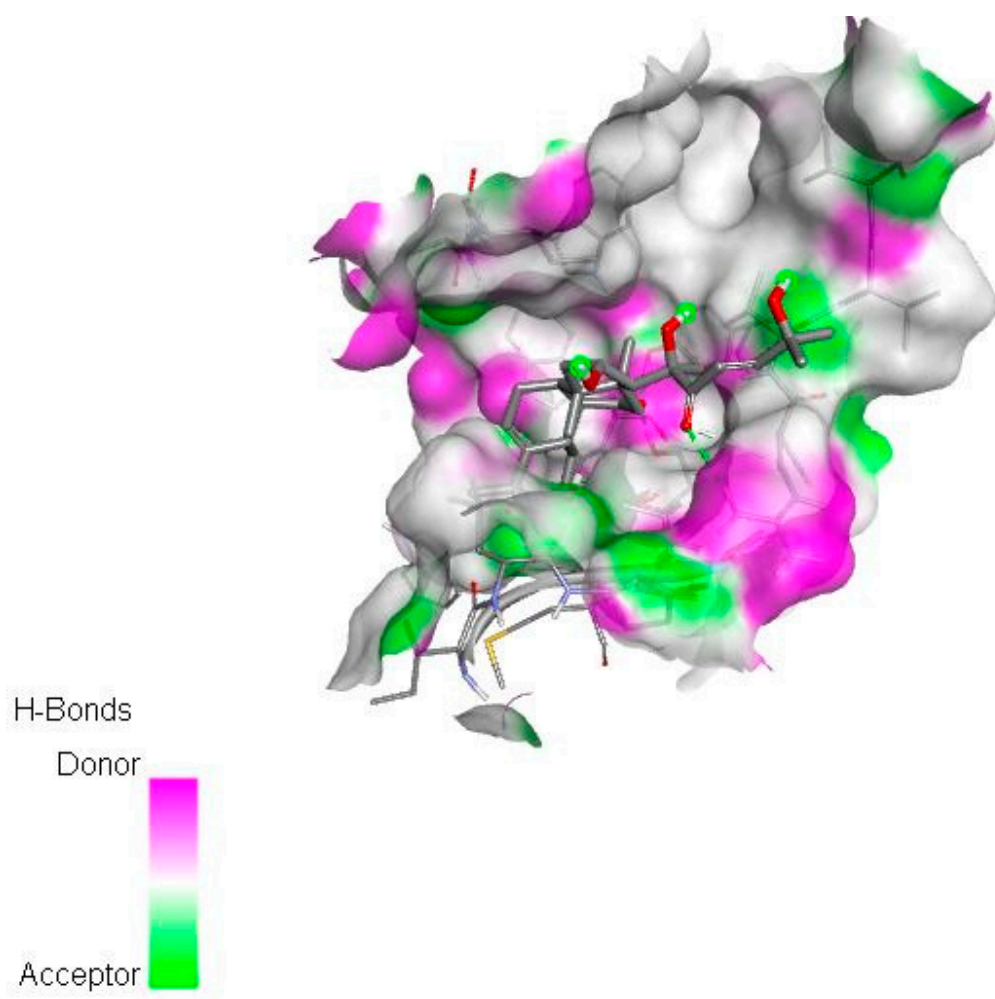

**C) Cucurbitacin-D**

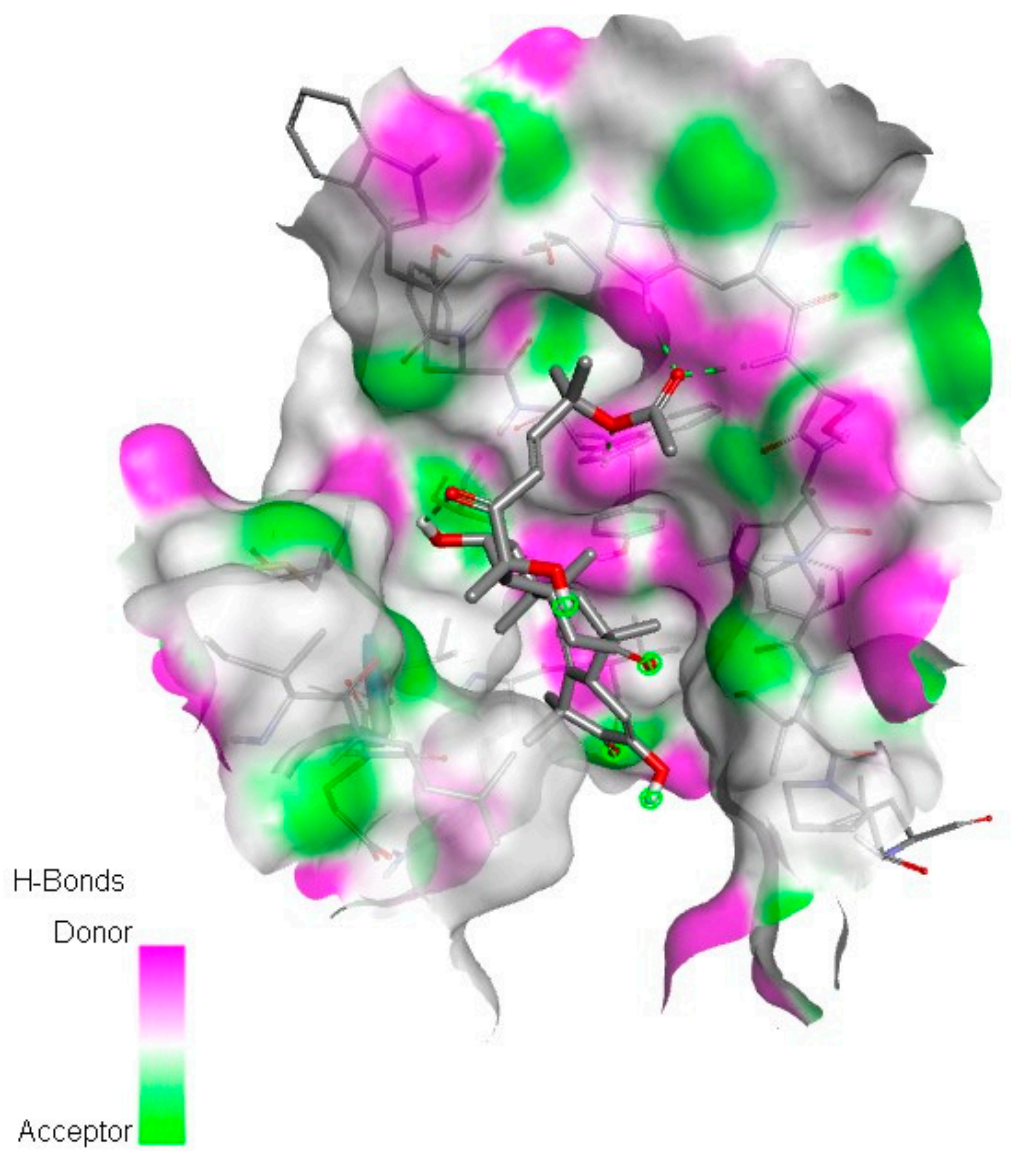

**D) Cucurbitacin-E**

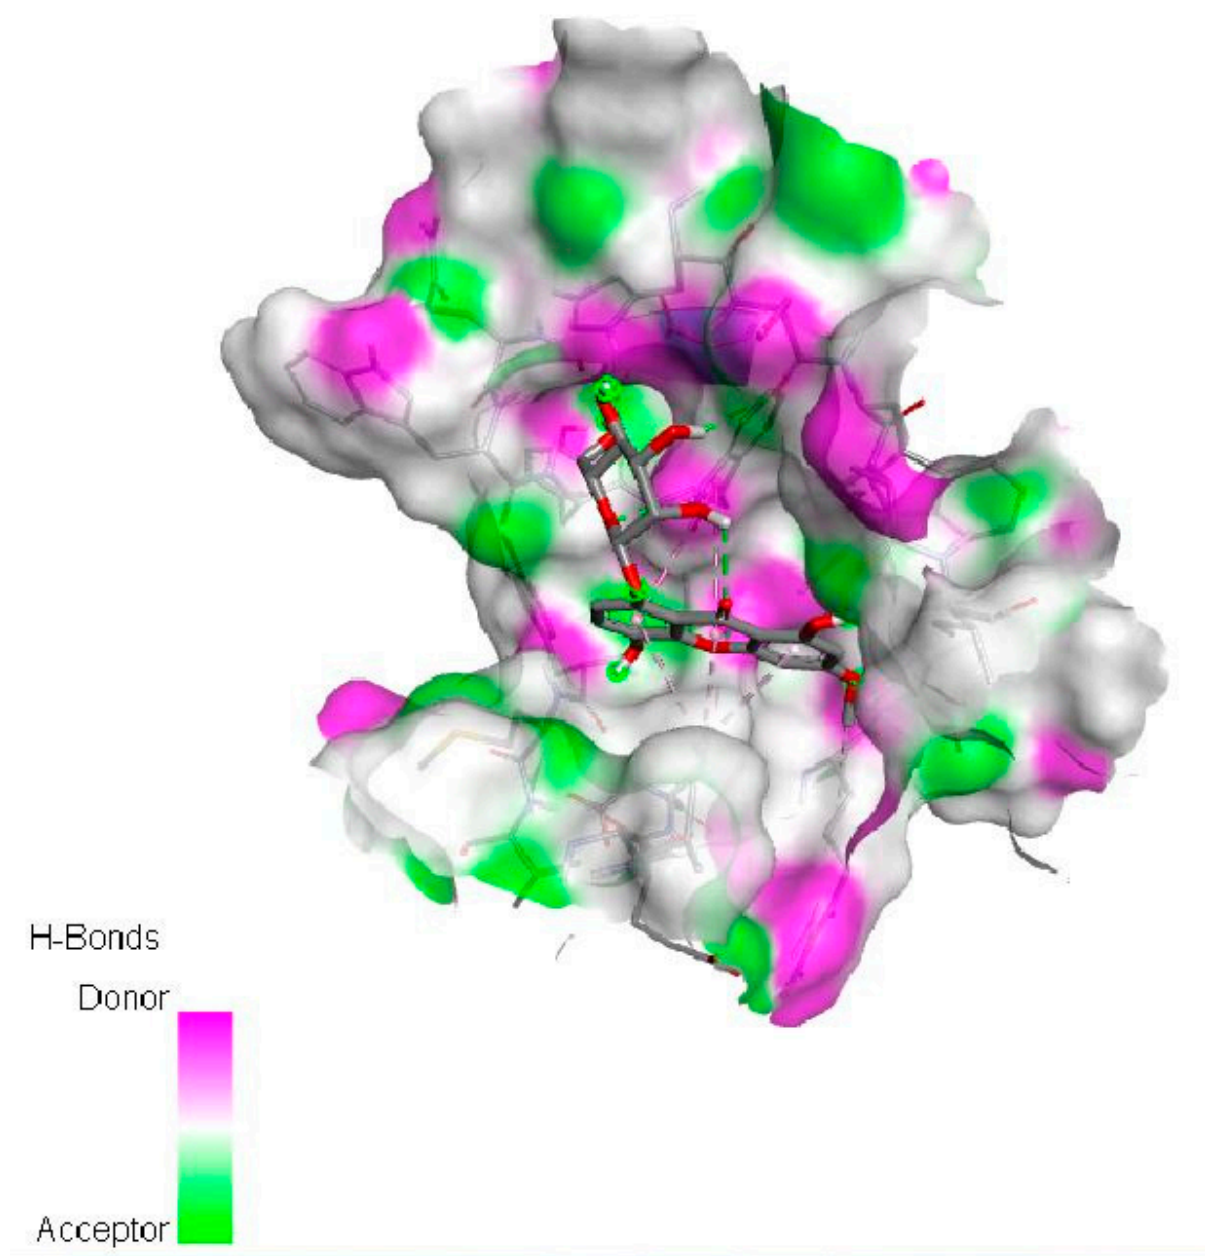

E) Swertianolin



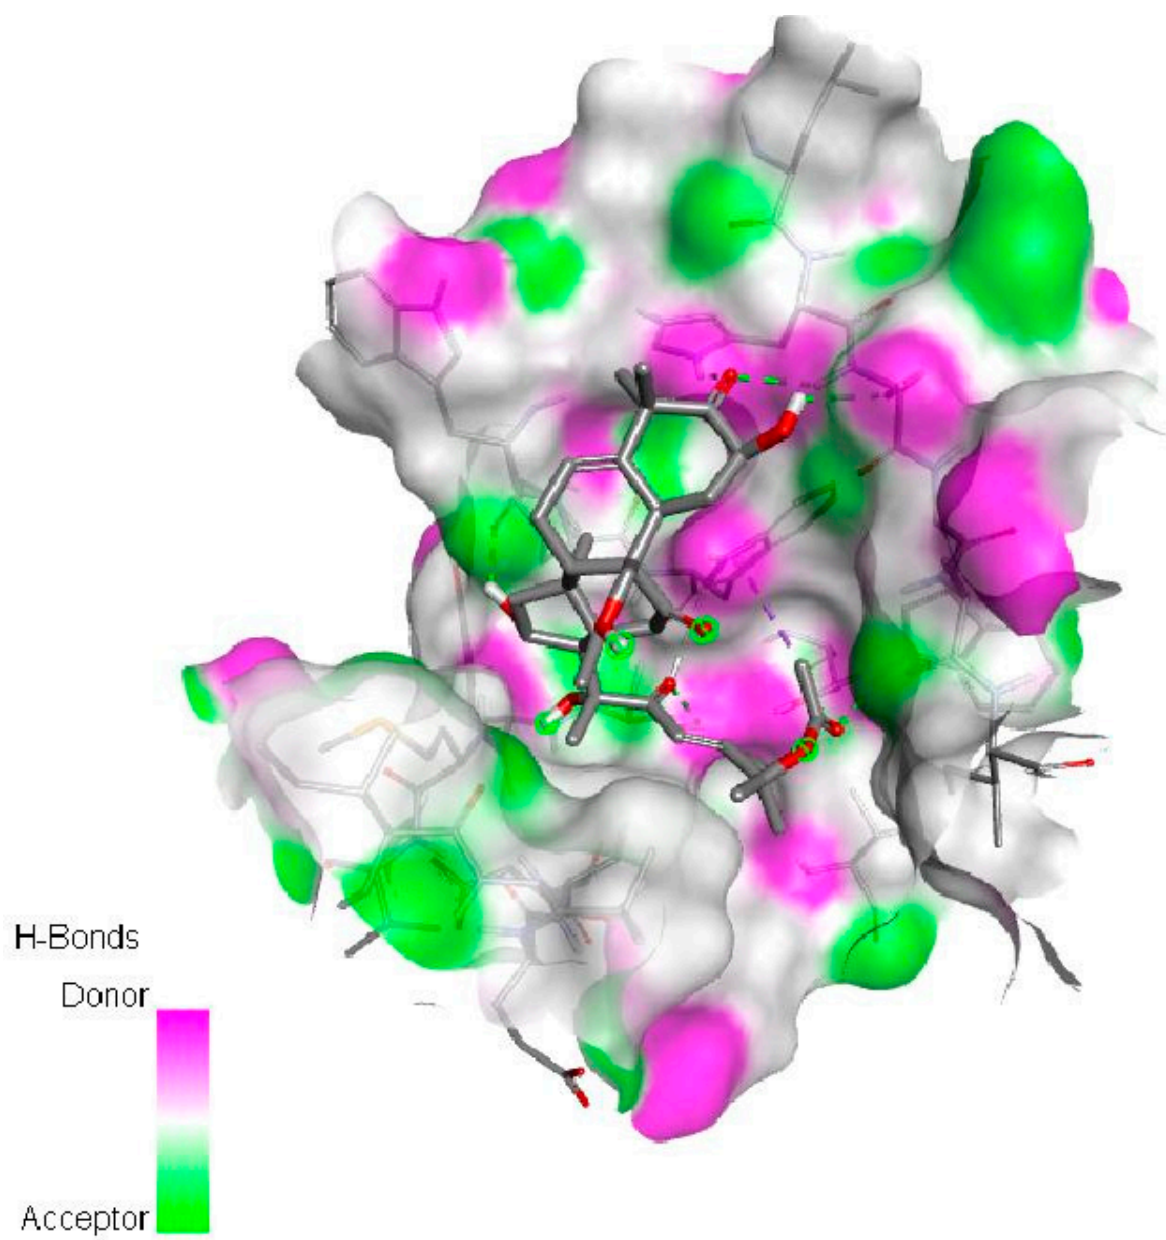

F) Cucurbitacin-A

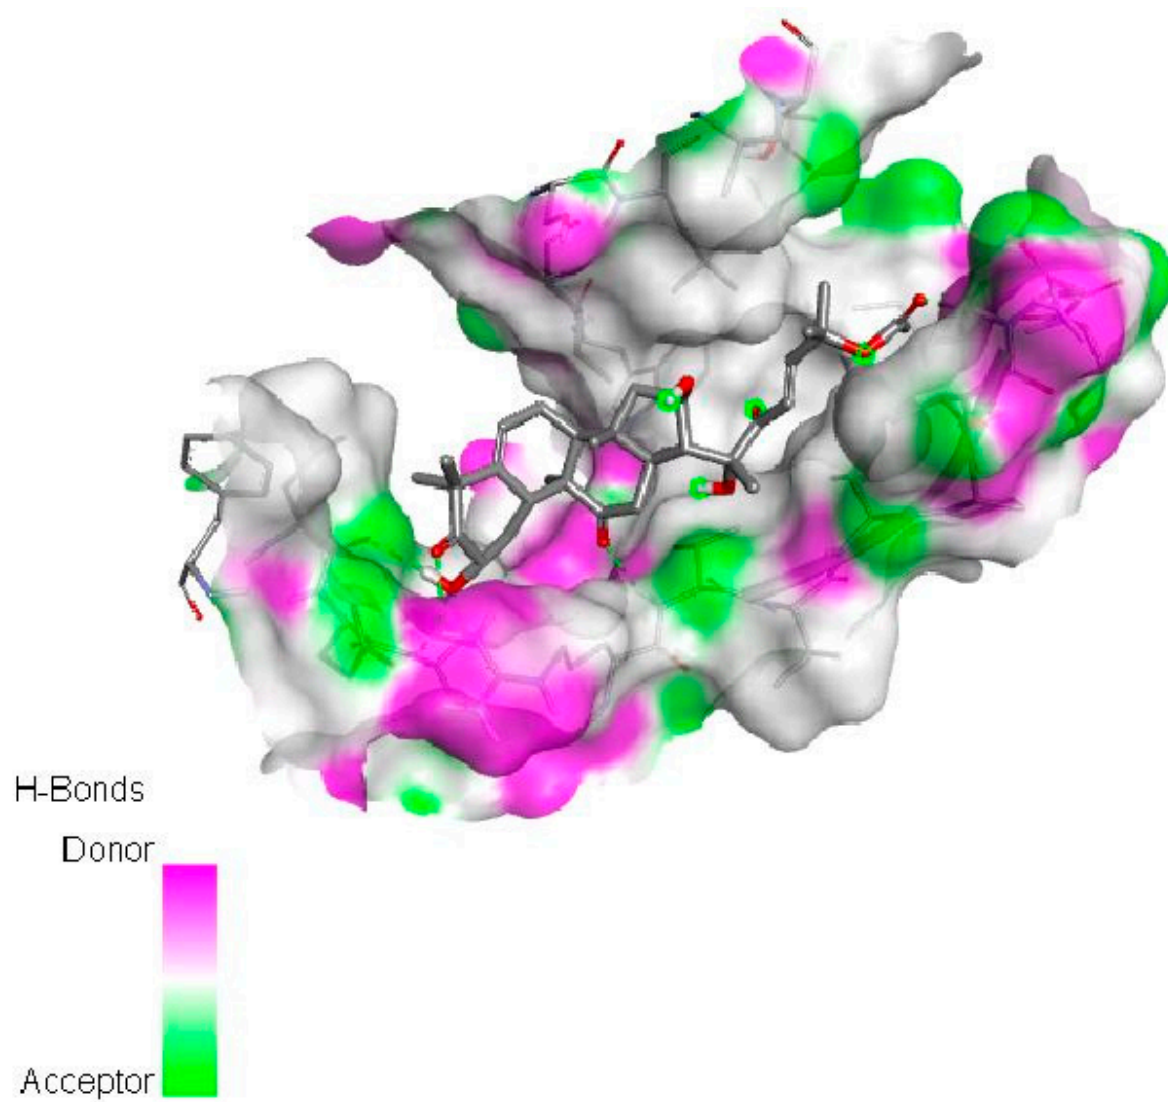

**G) Cucurbitacin-B**

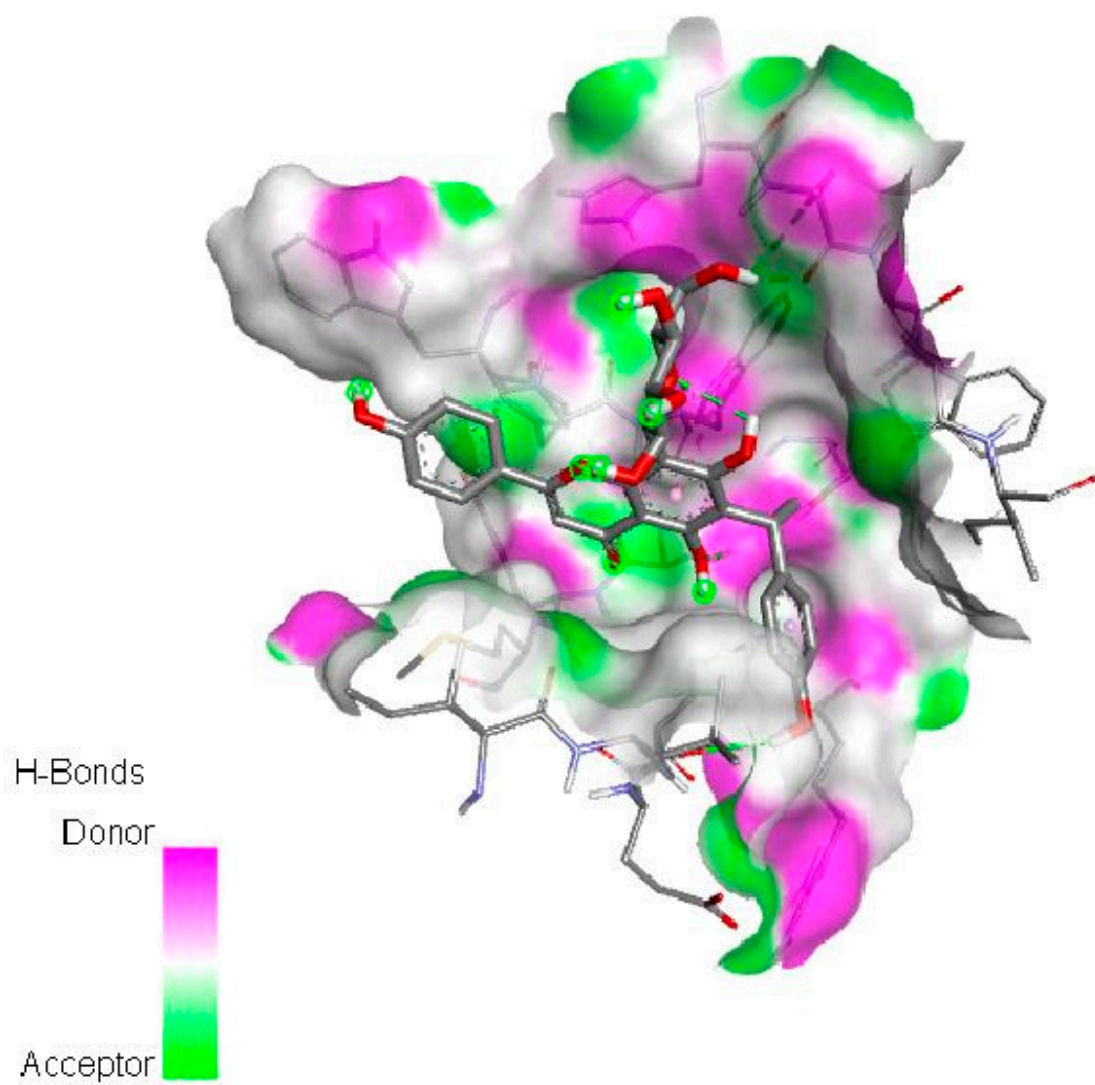

H) Cucumerin-A



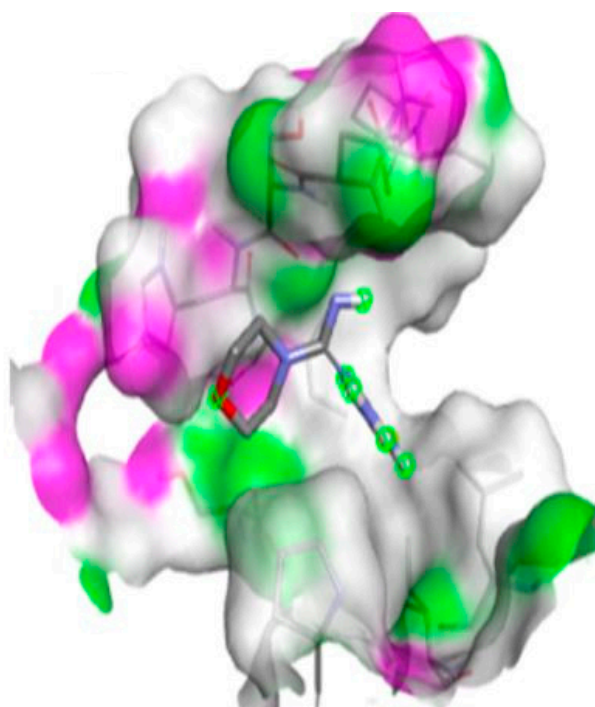

H-Bonds

Donor

Acceptor

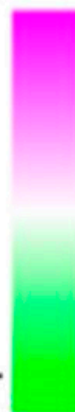

**I) Luotonin A**
