# Supplementary material for: Identification of Potential Phytochemical/Antimicrobial Agents against Pseudoperonospora cubensis Causing Downy Mildew in Cucumber through In-Silico Docking
Source: MDPI journal article supplement (doi:10.3390/plants12112202), 2023-06-02

**Supplementary Figure S5.** 2D visualization of the interaction between QNE 4 effector protein with top five phytochemicals A) Cucumerin A B) Cucumerin B C) Isocarpin D) Apigenin -7-O- glucoside E) Cucurbitacin-BF) Cucurbitacin-D G) Cucurbitacin-A H) Cucurbitacin-E I) Cucurbitacin-I

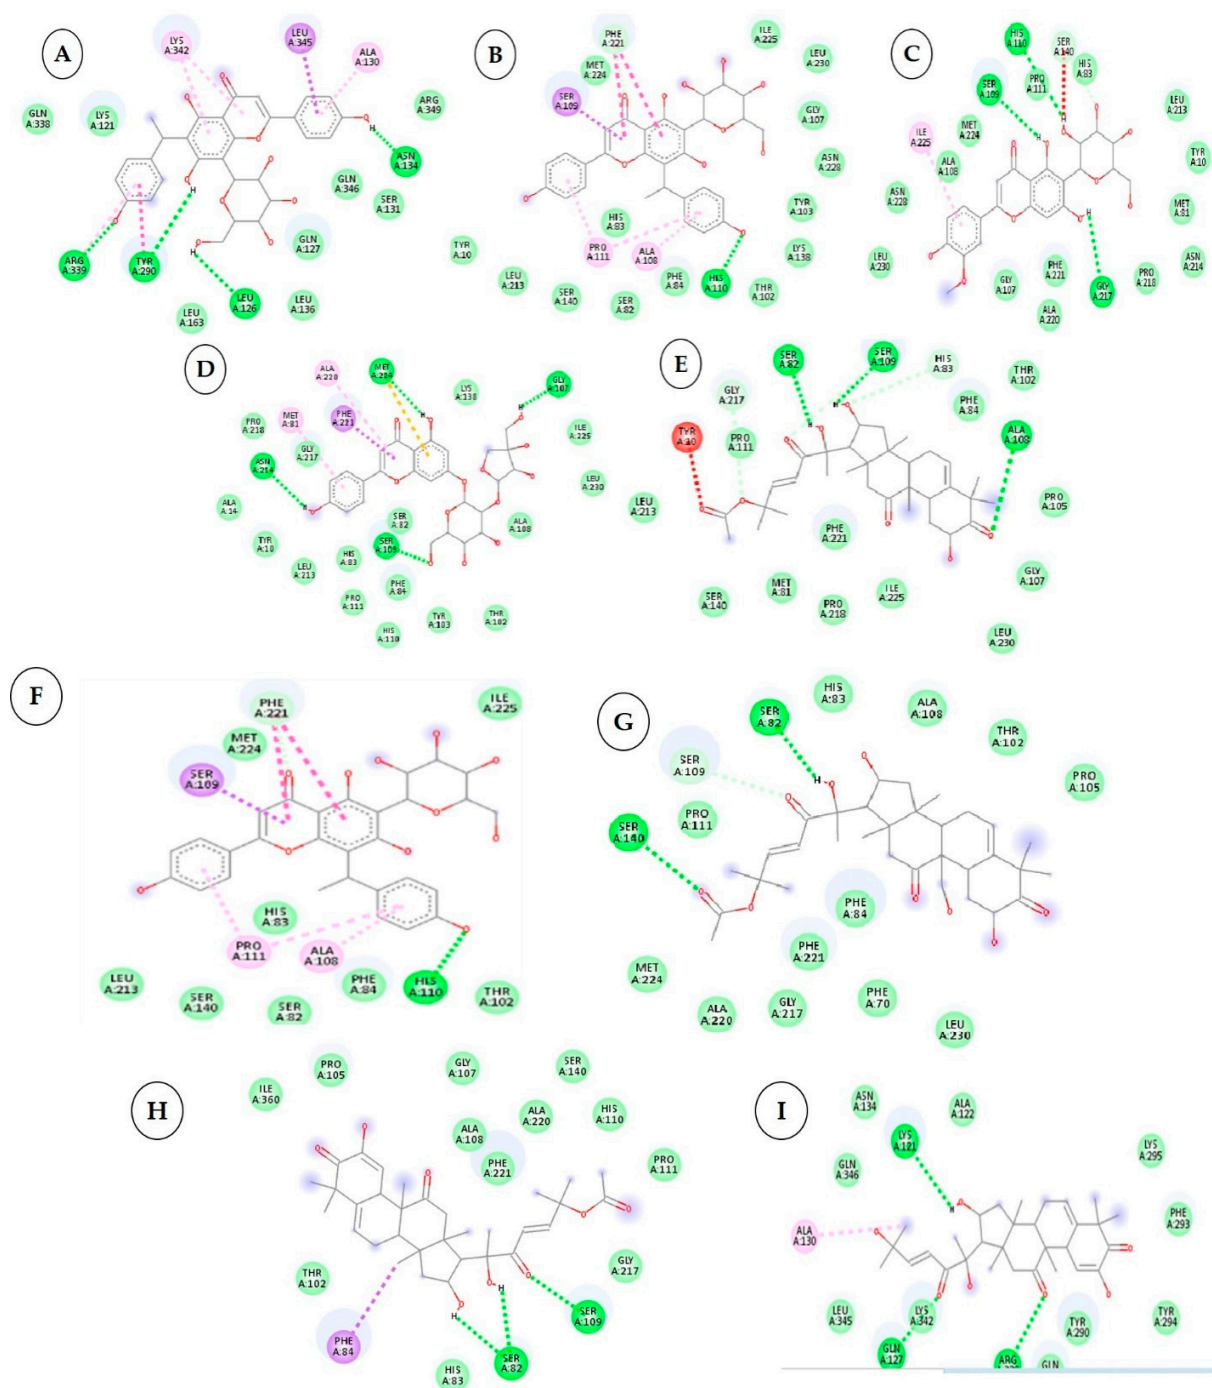

Supplement: s1 [file s1]
