# Supplementary material for: Identification of Potential Phytochemical/Antimicrobial Agents against Pseudoperonospora cubensis Causing Downy Mildew in Cucumber through In-Silico Docking
Source: MDPI journal article supplement (doi:10.3390/plants12112202), 2023-06-02
Supplement: s1 [file s1]

**Supplementary Figure S4.** 3D visualization of the interaction between cytochrome oxidase subunit 1 protein with top nine compounds from botanicals and chemical sources A) Azoxystrobin B) Allyl acetate C) Kresoxim methyl D) Curzate.

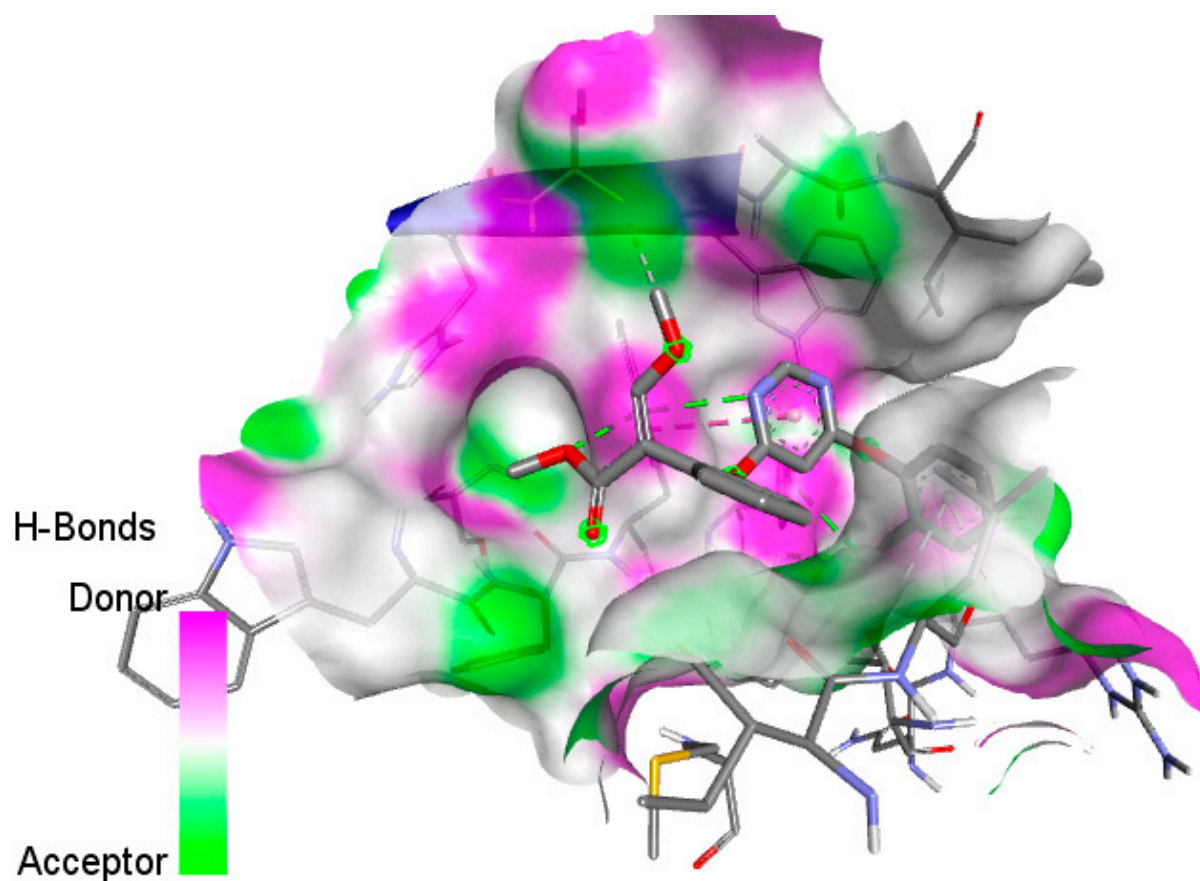

**A) Azoxystrobin**

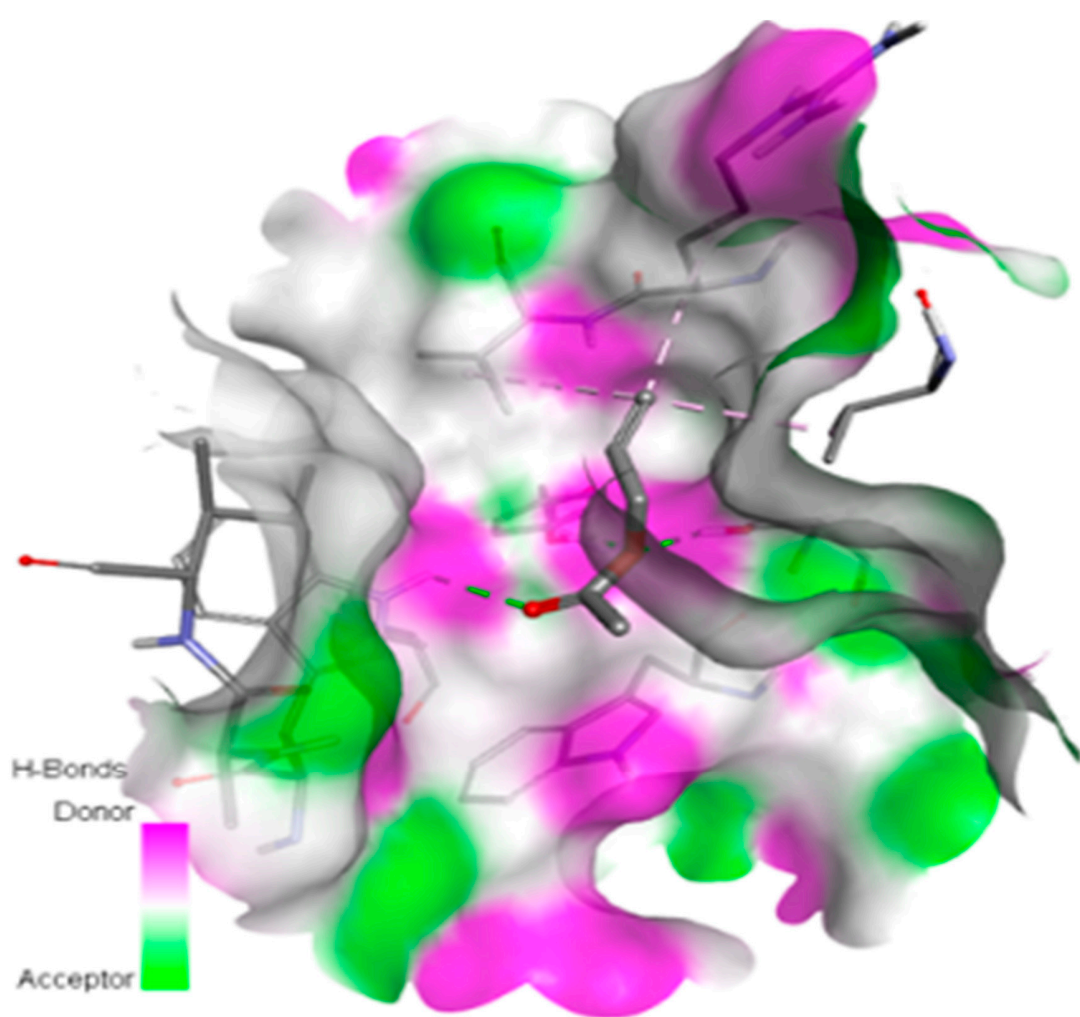

B) Allyl acetate

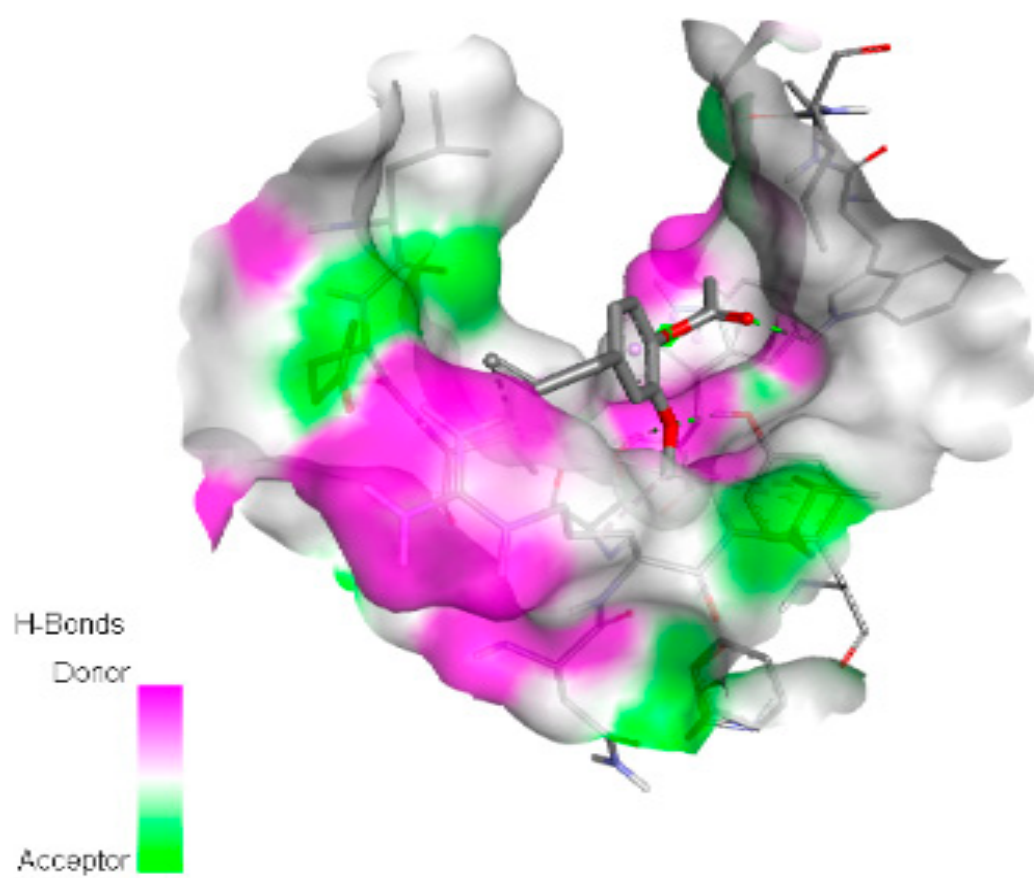

C) Kresoxim methyl

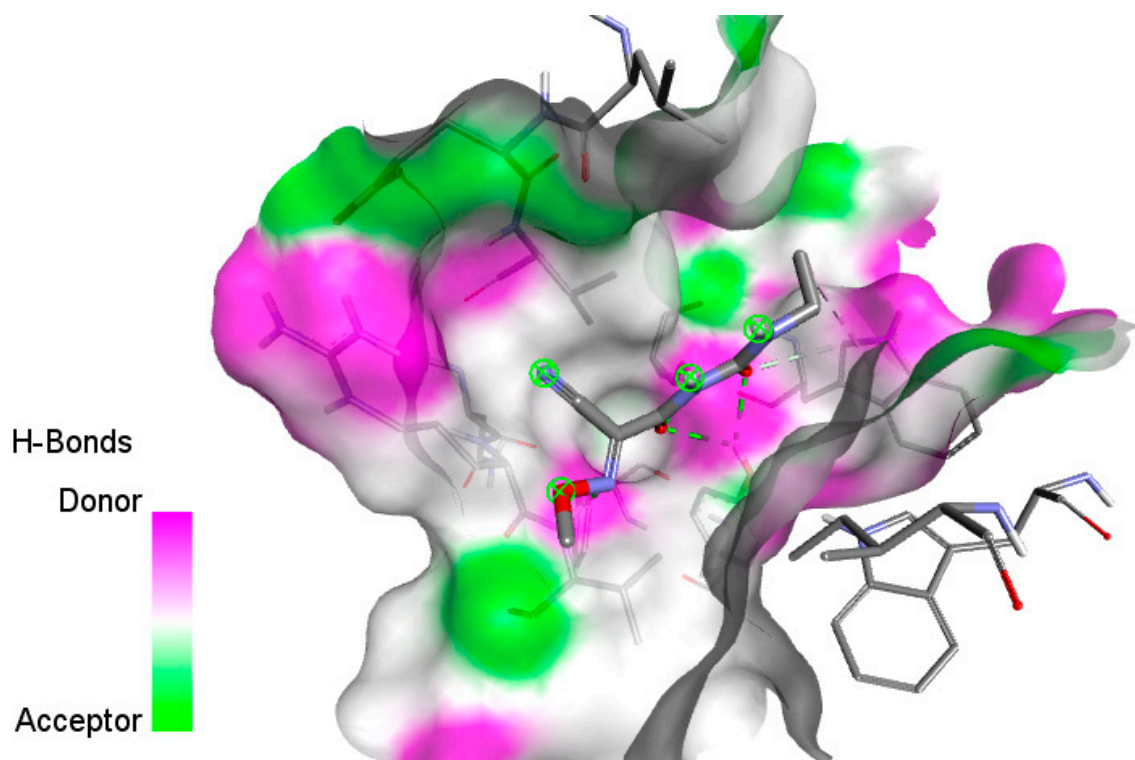

D) Curzate
