# Supplementary material for: Identification of Potential Phytochemical/Antimicrobial Agents against Pseudoperonospora cubensis Causing Downy Mildew in Cucumber through In-Silico Docking
Source: MDPI journal article supplement (doi:10.3390/plants12112202), 2023-06-02
Supplement: s1 [file s1]

**Supplementary Figure S3.** 3D visualization of the interaction between QNE 4 effector protein with top compounds from botanicals and chemical sources A) Azoxystrobin B) Allyl acetate C) Salicylic acid D) Curzate E) Allixin

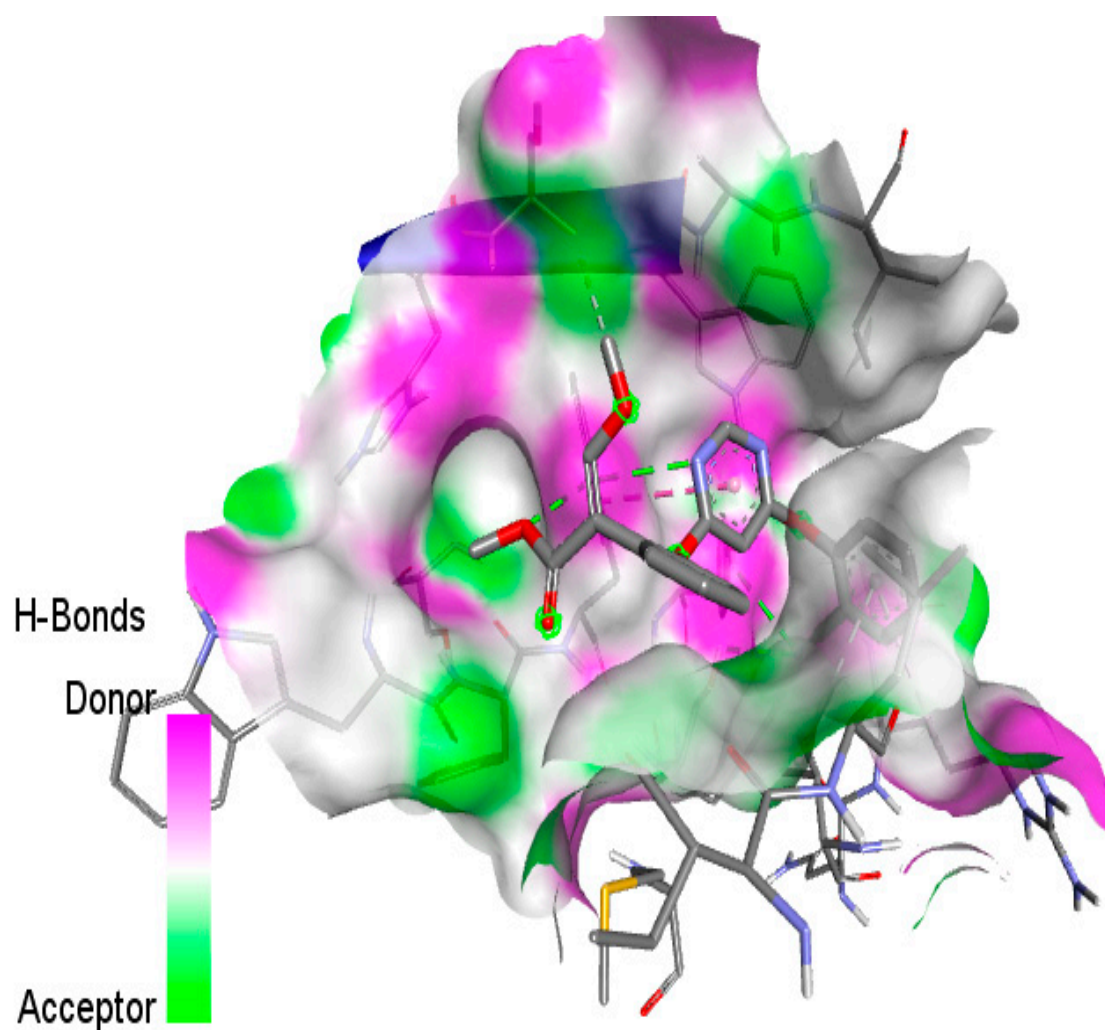

**A) Azoxystrobin**

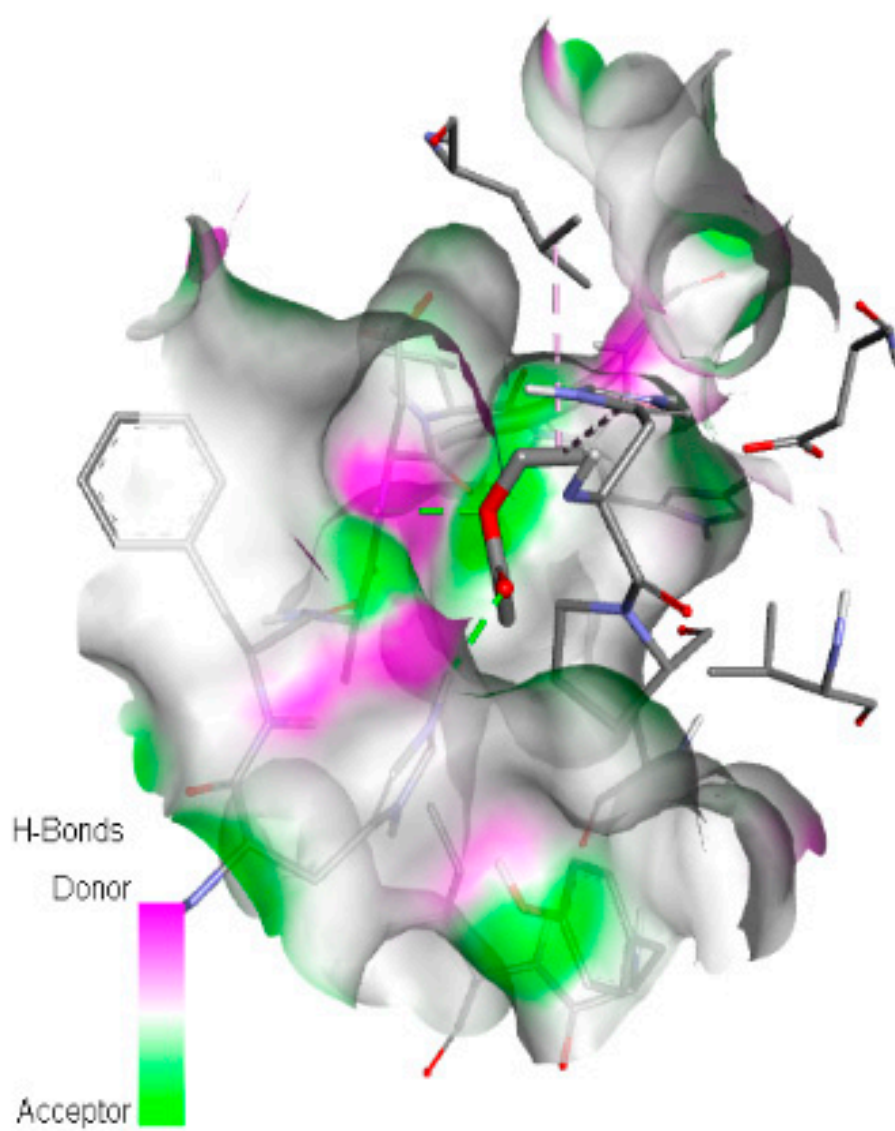

B) Allyl acetate

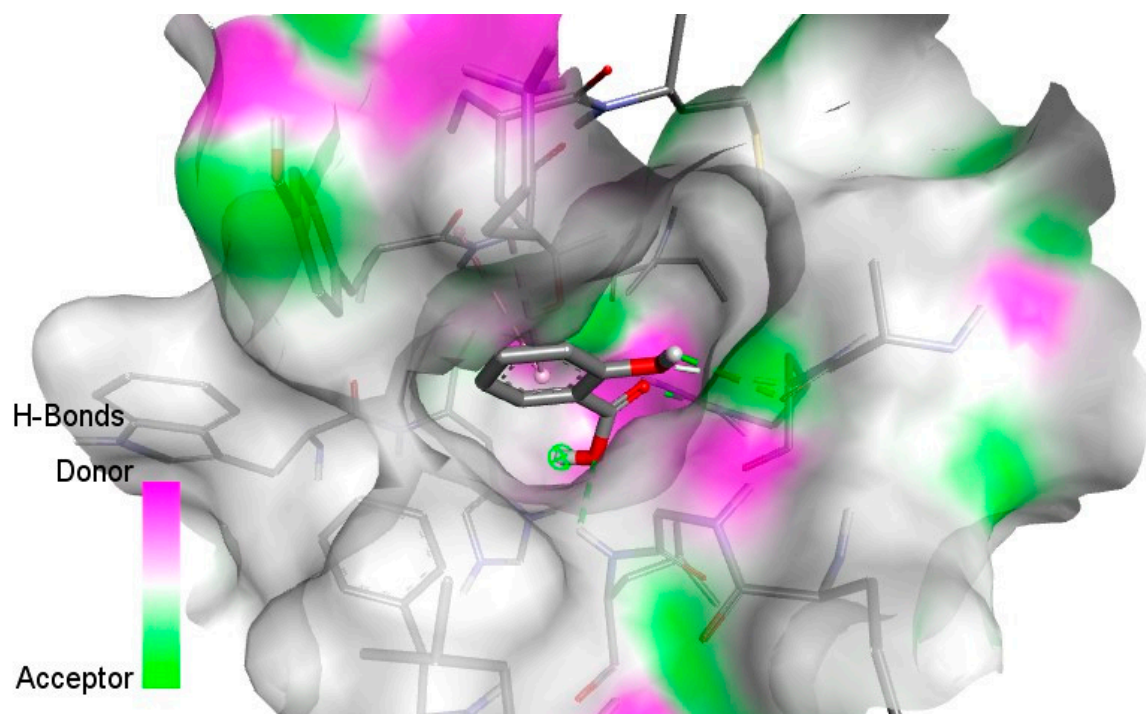

C) Salicylic acid

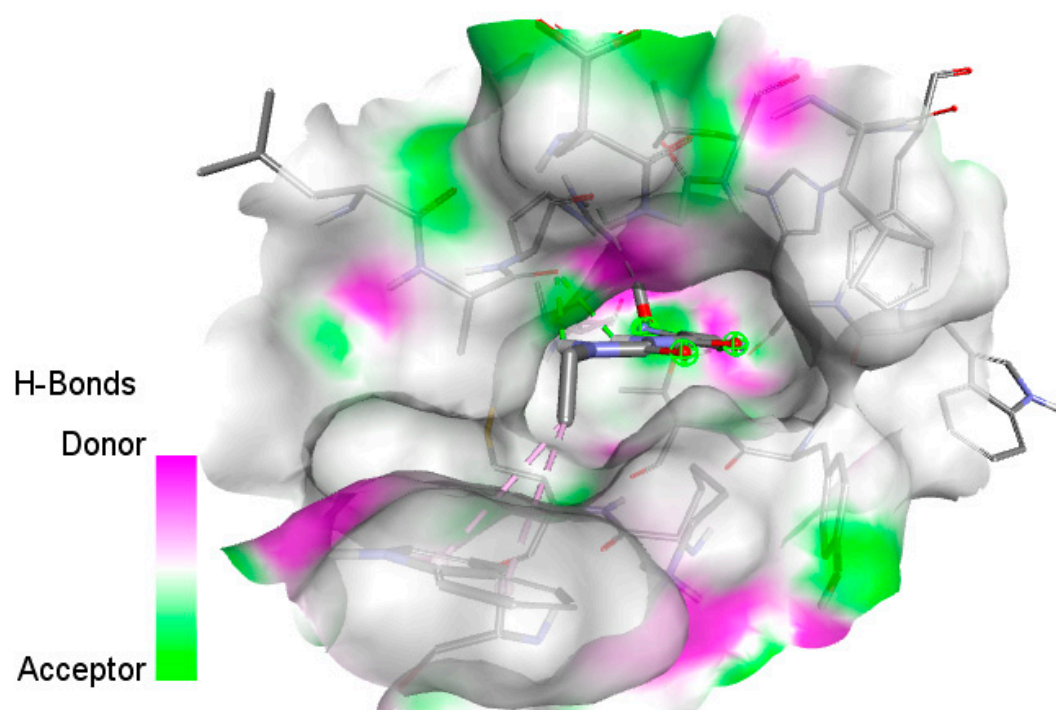

D) Curzate

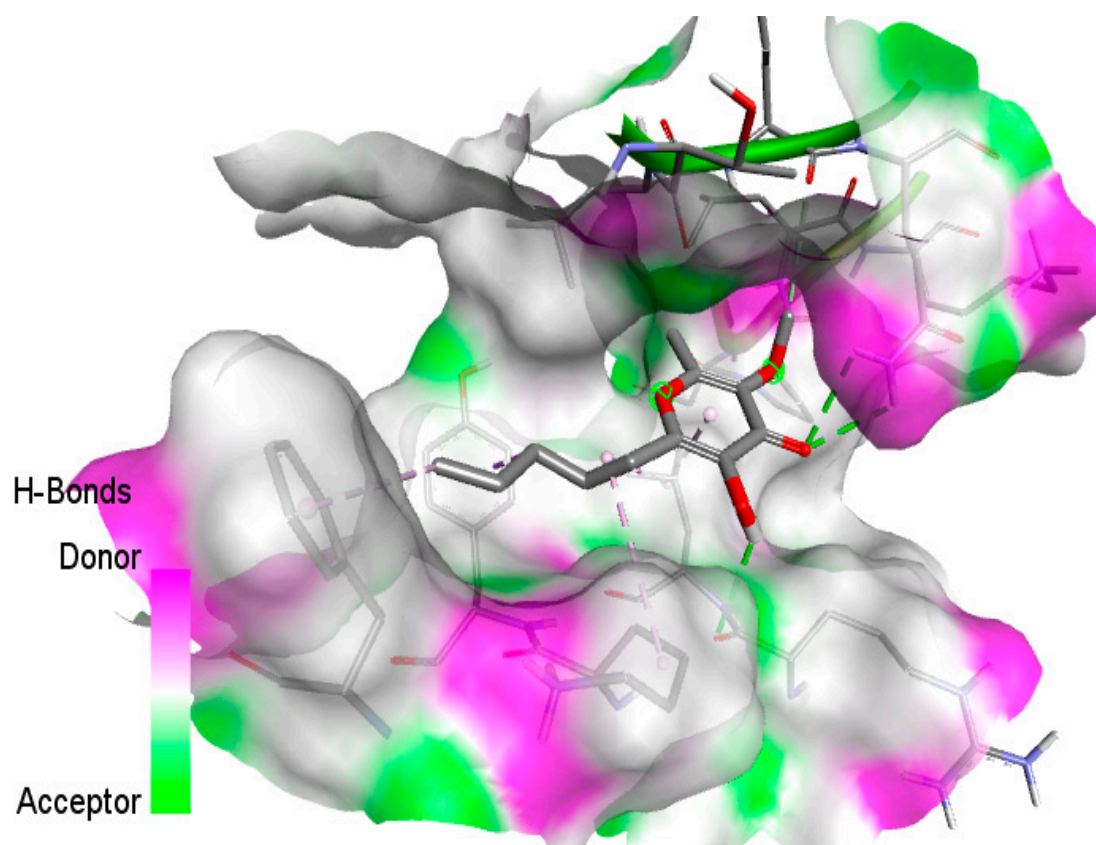

E) Allixin
