# Supplementary material for: Identification of Potential Phytochemical/Antimicrobial Agents against Pseudoperonospora cubensis Causing Downy Mildew in Cucumber through In-Silico Docking
Source: MDPI journal article supplement (doi:10.3390/plants12112202), 2023-06-02
Supplement: s1 [file s1]

**Supplementary Figure S1.** 3D visualization of the interaction between QNE4 effector protein with top nine phytochemicals A) Cucumerin-A B) Cucumerin-B C) Isoscoparin D) Apigenin -7-O -glucoside .E) Cucurbitacin-B F) Cucurbitacin-D G) Cucurbitacin-A H) Cucurbitacin-E I) Cucurbitacin-I

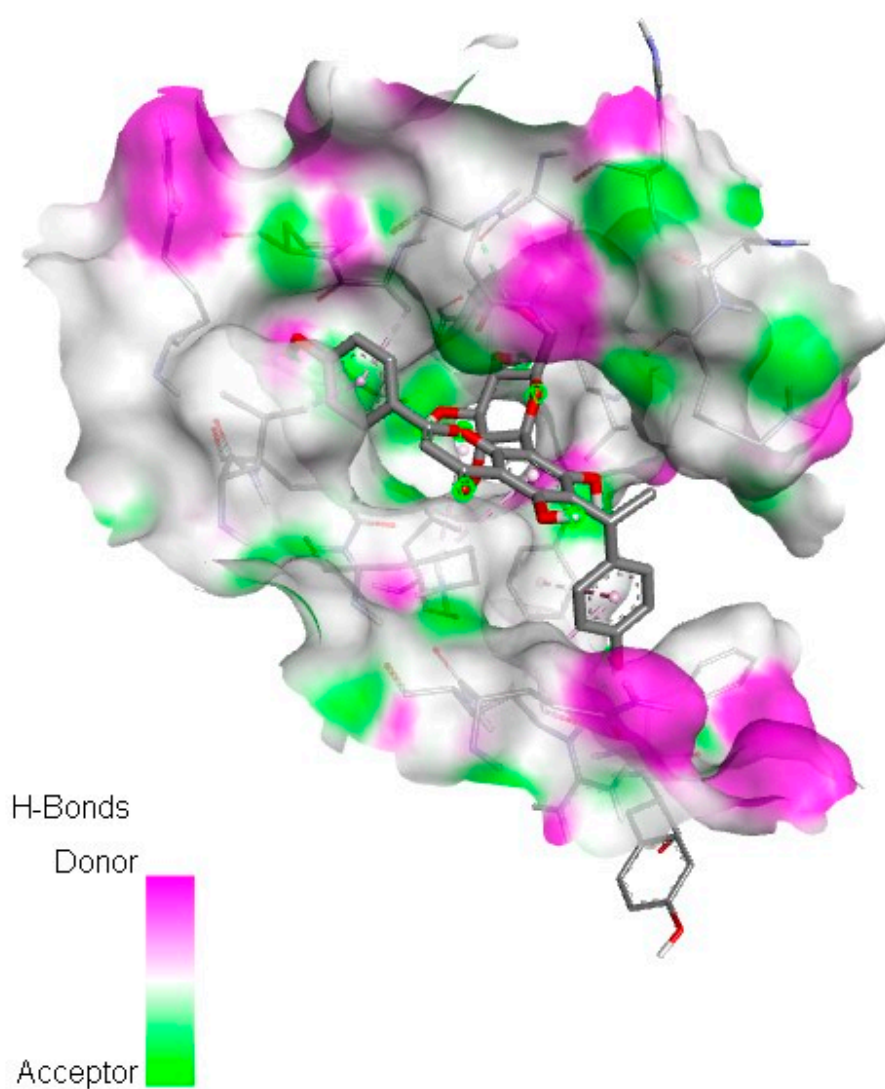

**A) Cucumerin-A**

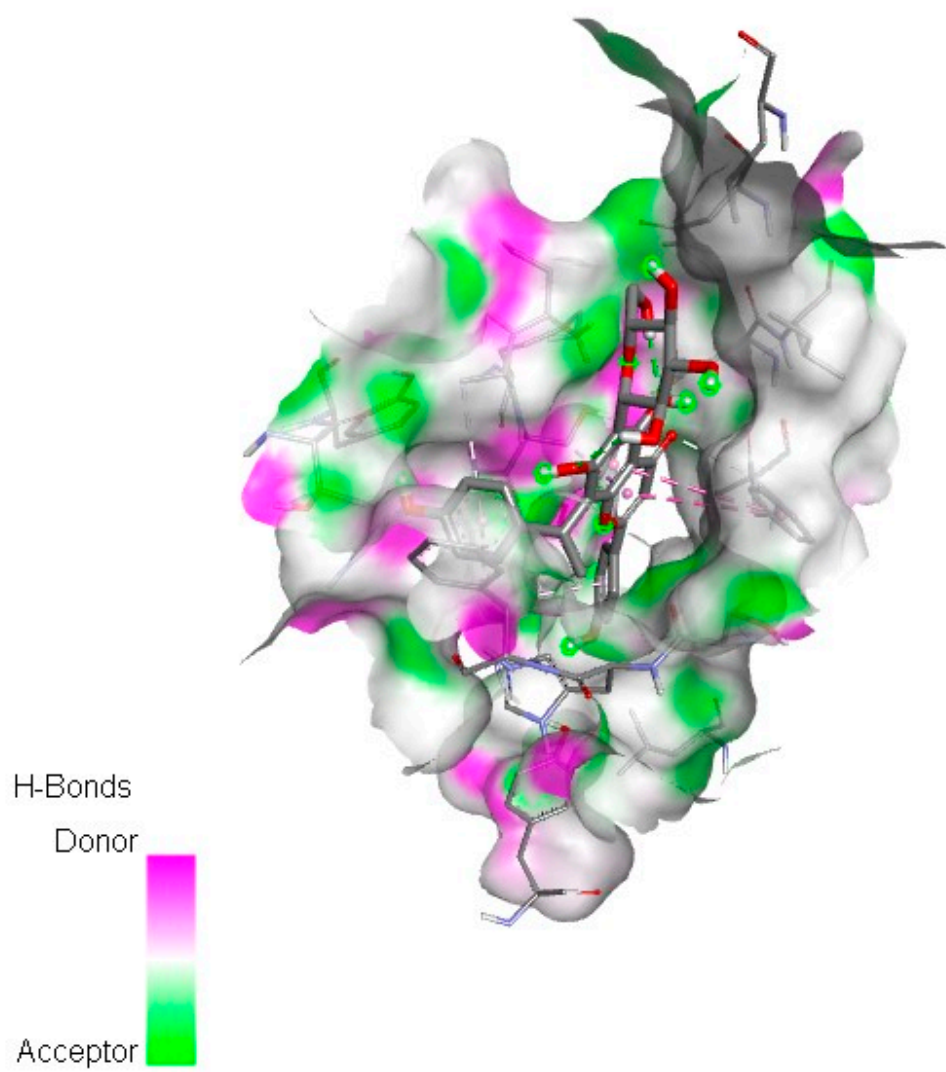

**B) Cucumerin-B**

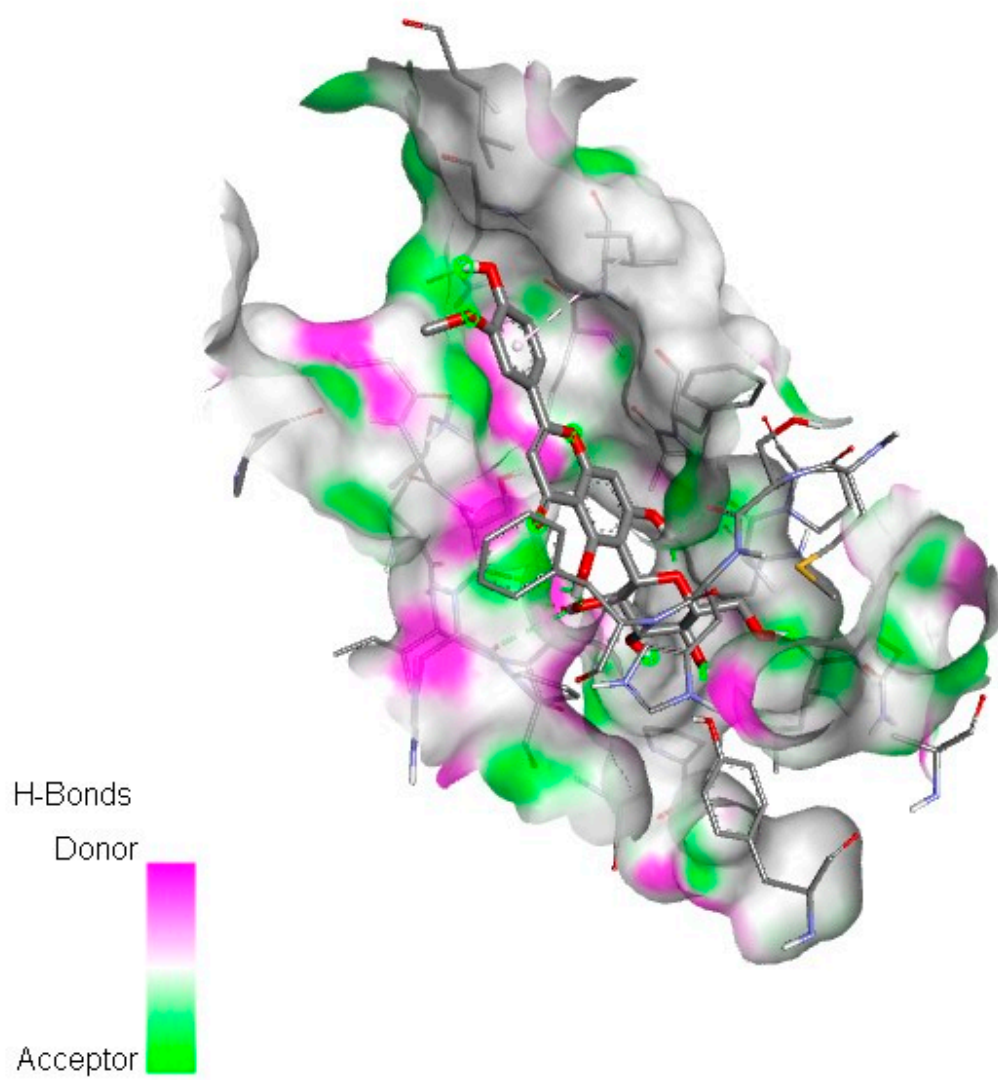

C) Isoscoparin

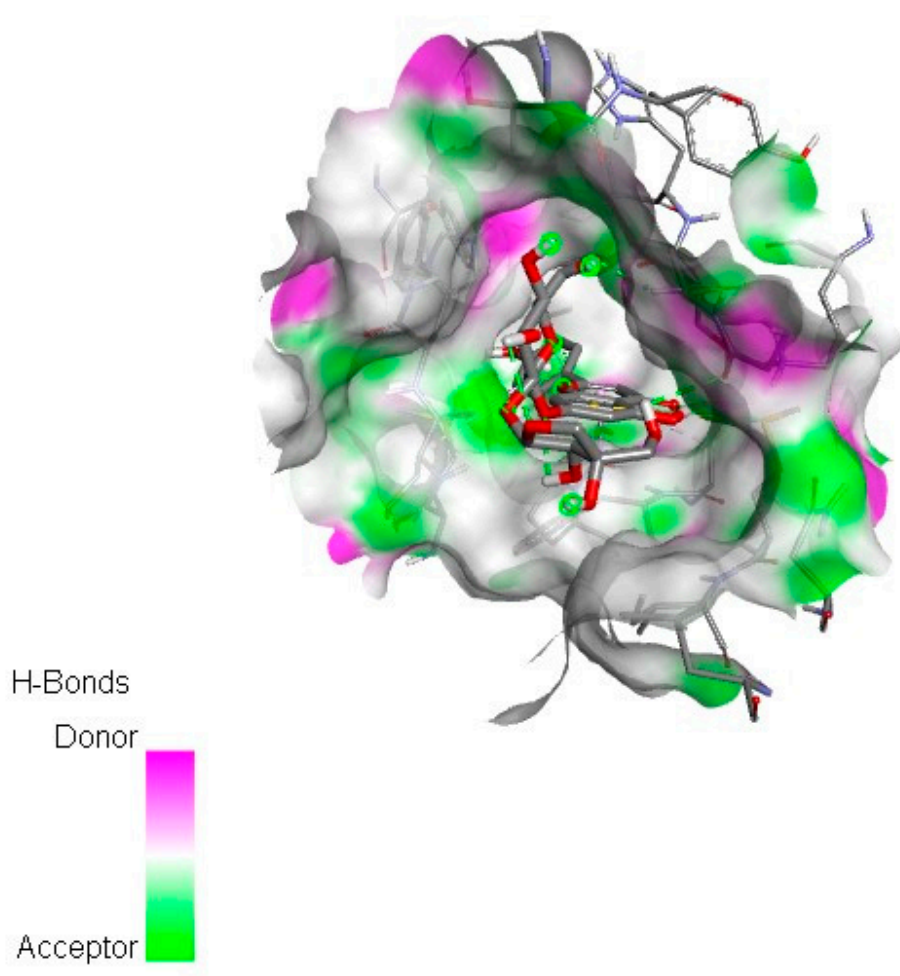

**D) Apigenin -7-O –glucoside**

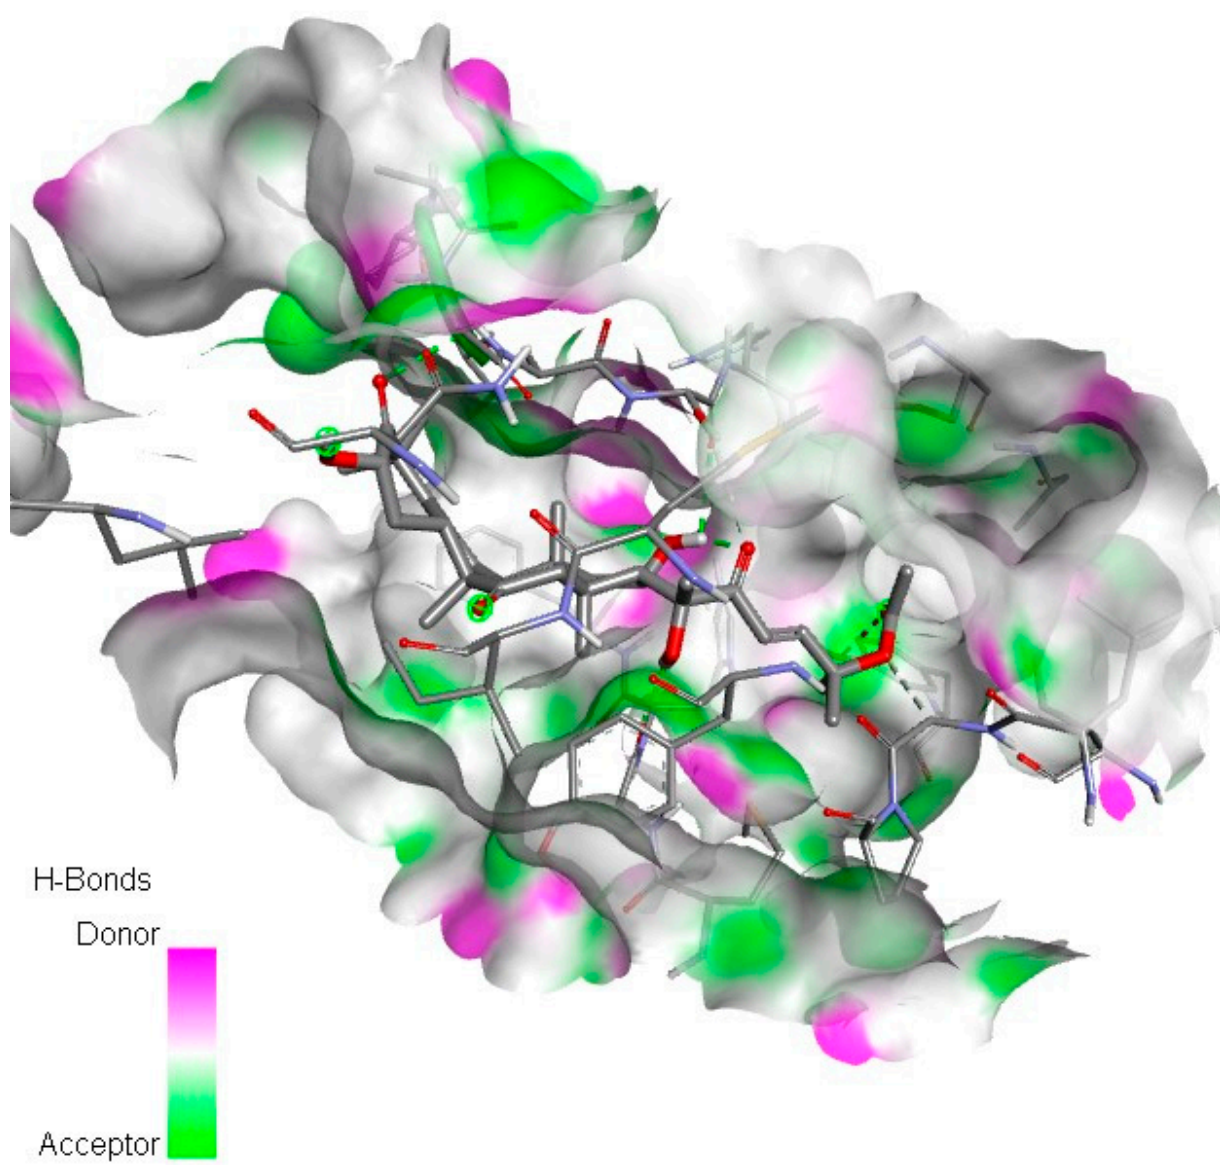

**E) Cucurbitacin-B**



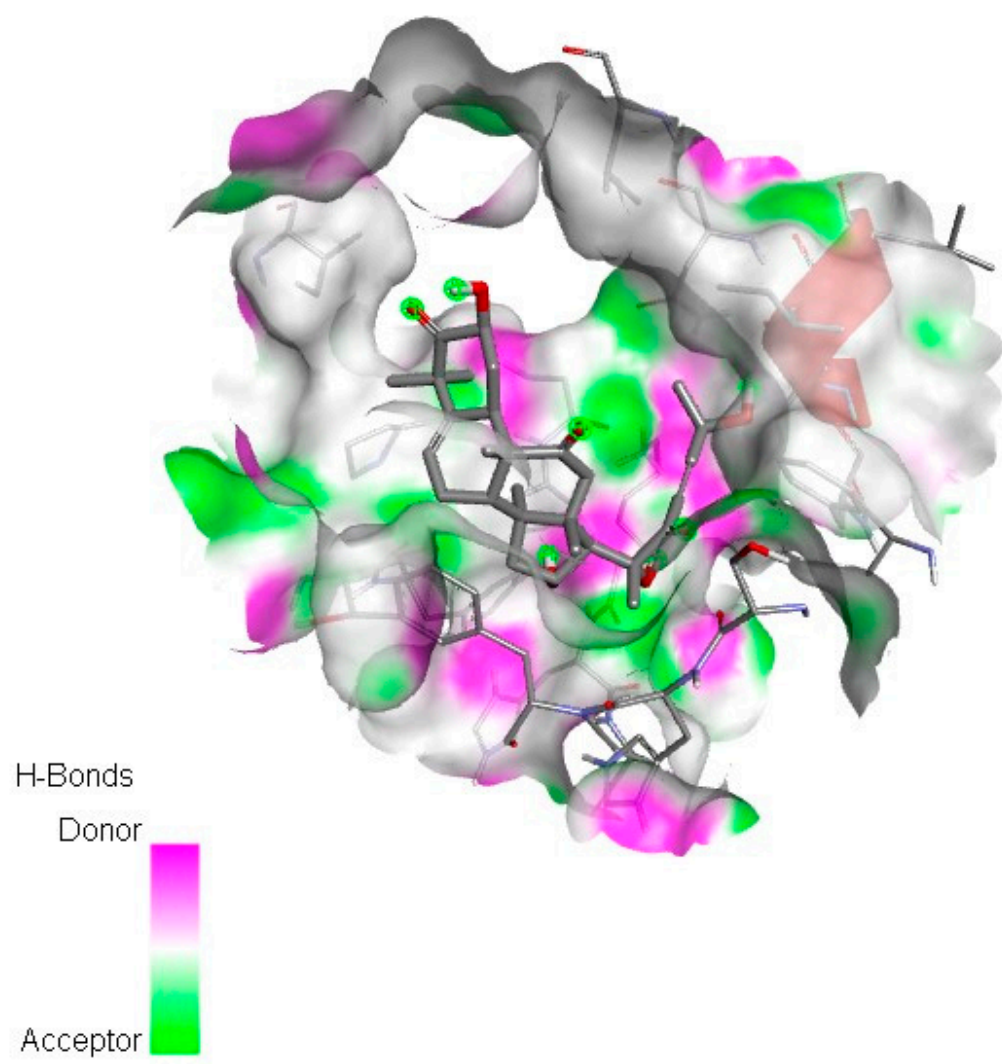

**F) Cucurbitacin-D**

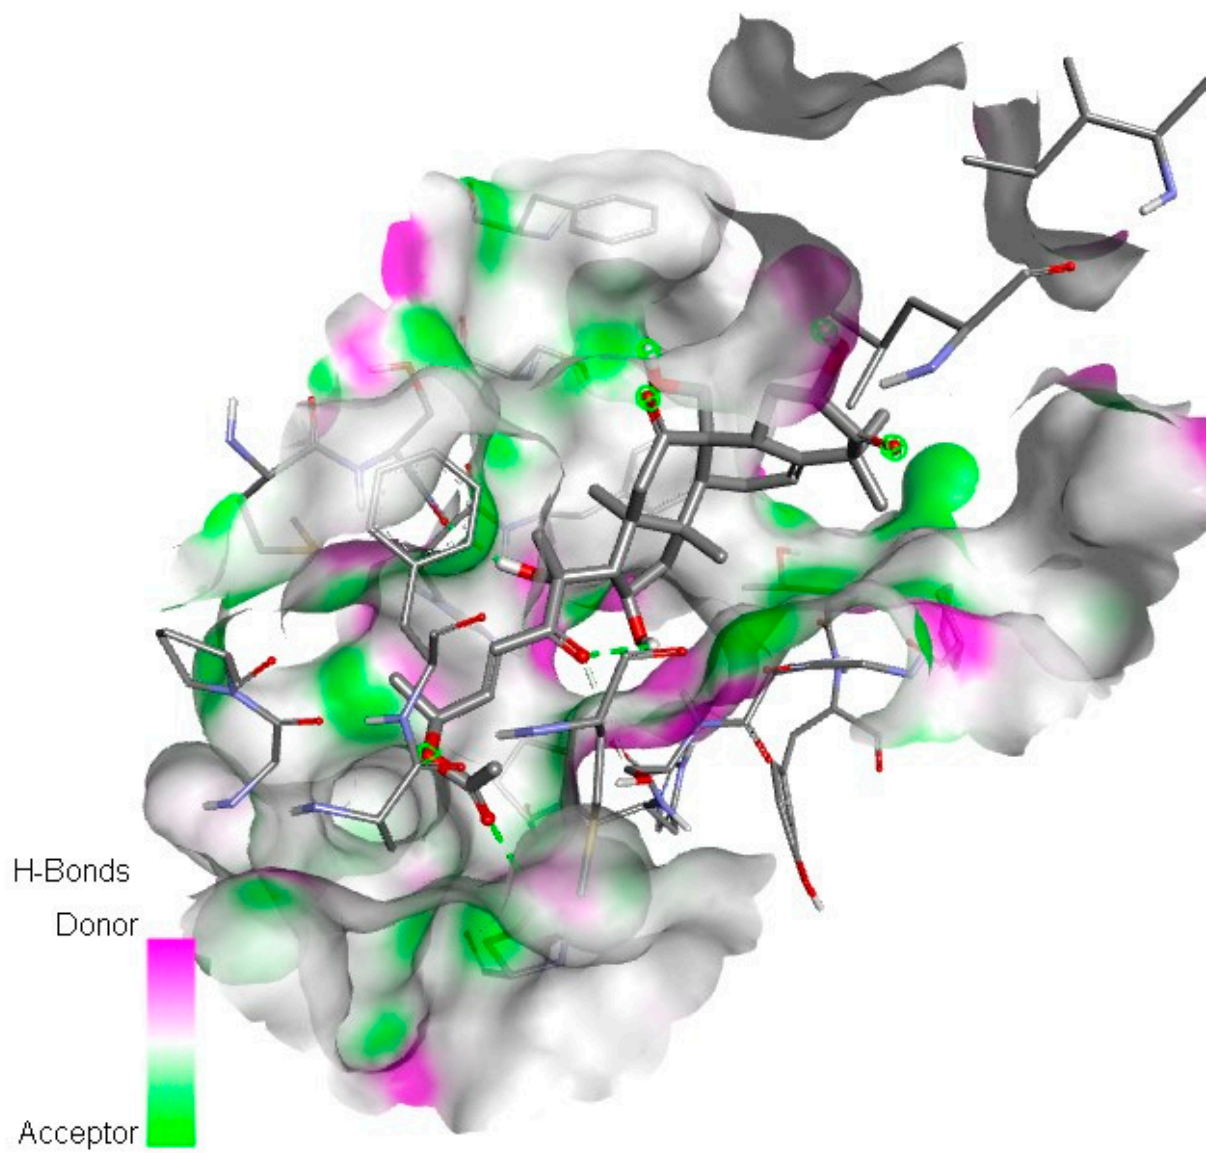

**G) Cucurbitacin-A**

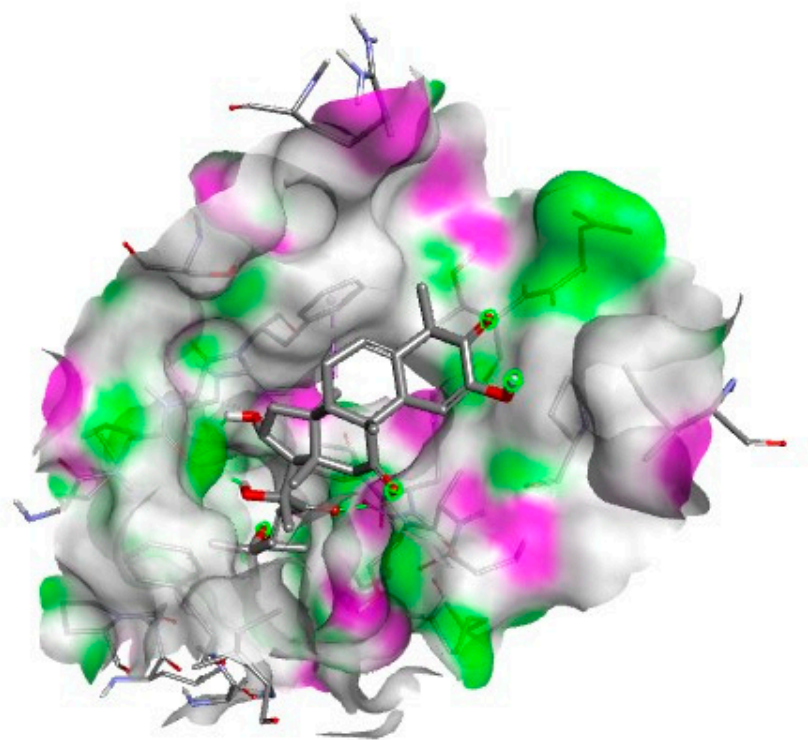

H-Bonds  
Donor  
Acceptor

**H) Cucurbitacin-E**



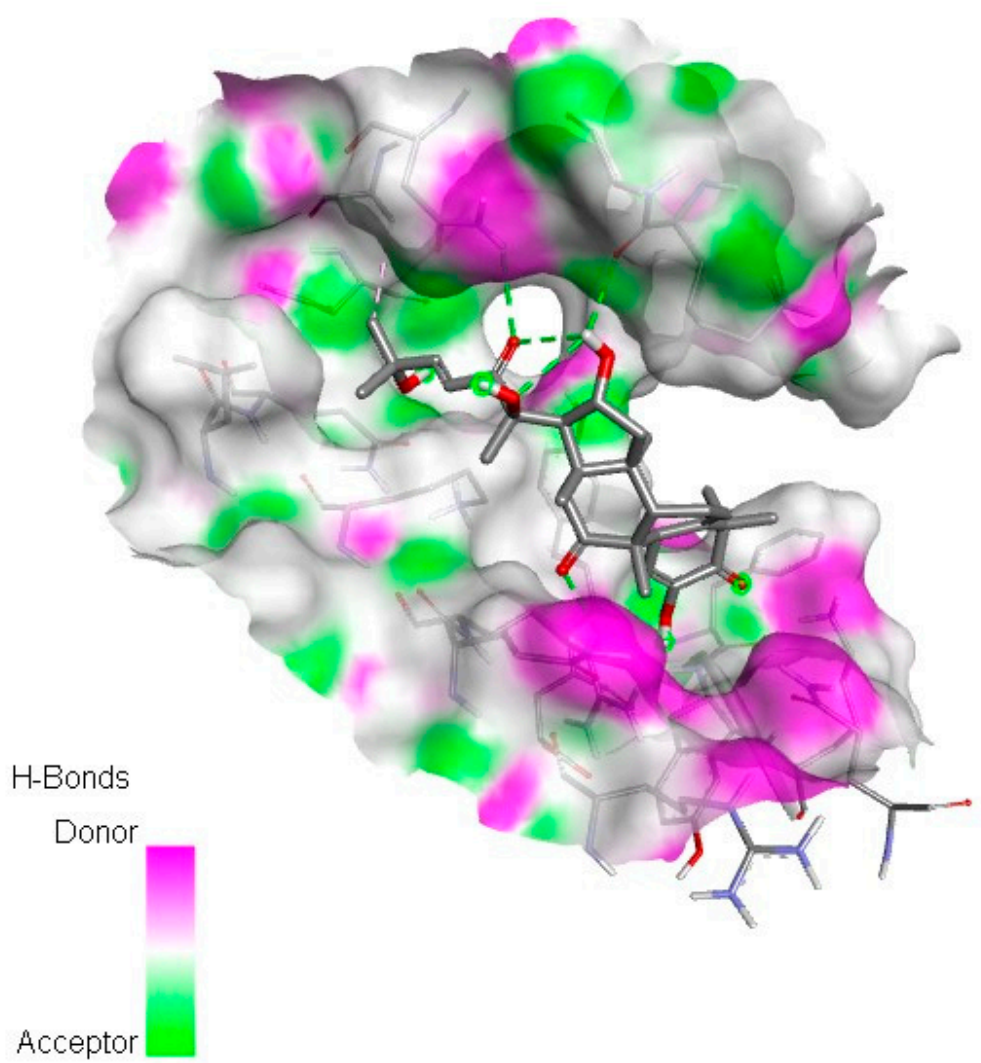

I) Cucurbitacin-I
